# Supplementary material for: NiCoP/g-C 3 N 4 nanocomposites for efficient photocatalytic hydrogen production from seawater
Source: Royal Society of Chemistry journal article supplement (doi:10.1039/d5nj04357c), 2025-12-08
Supplement: d5nj04357c1.pdf [file d5nj04357c1.pdf]

## Supplementary material

# NiCoP/g-C<sub>3</sub>N<sub>4</sub> Nanocomposites for Efficient Photocatalytic Hydrogen Production from Seawater

Zhufeng Lu<sup>a,b†</sup>, Qiaoyi Xiao<sup>a,d†</sup>, Yangjie Zhou<sup>a</sup>, Li Zhou<sup>a</sup>, Qiqi Gu<sup>a</sup>, Yuan Lian<sup>a,d</sup>, Hongmei Wang<sup>a,\*</sup>,  
Siqian Zhang<sup>a</sup>, Xiao Wang<sup>c,\*</sup>

<sup>a</sup> College of Biological, Chemical Sciences and Engineering, Jiaxing University, Jiaxing 314001, China

<sup>b</sup> Analytical & Testing Center, Jiaxing University, Jiaxing 314001, China

<sup>c</sup> School of Physics, East China University of Science and Technology, Shanghai 200237, China

<sup>d</sup> College of Material and Textile Engineering, Jiaxing University, Jiaxing 314001, China

## 1. Experimental

### 1.1 Synthesis of g-C<sub>3</sub>N<sub>4</sub>

A mixture of 5.0 g melamine and 1.0 g ammonium oxalate monohydrate was thoroughly ground to ensure uniform blending. The resulting mixture was placed in an alumina crucible and heated in static air at a ramp rate of 3 °C/min to 550 °C, where it was maintained for 4 h. After thermal treatment, a yellow bulk precursor was obtained, which was then ground into a fine powder and transferred into a 150 mL beaker. Deionized water was added, and the suspension was subjected to ultrasonic treatment for 7 h to yield well-dispersed g-C<sub>3</sub>N<sub>4</sub> nanosheets. The resulting suspension was subsequently washed three times with distilled water and absolute ethanol to remove unreacted species and exfoliation residues. Finally, the suspension was dried at 70 °C for 12 h to obtain the g-C<sub>3</sub>N<sub>4</sub> nanosheets.

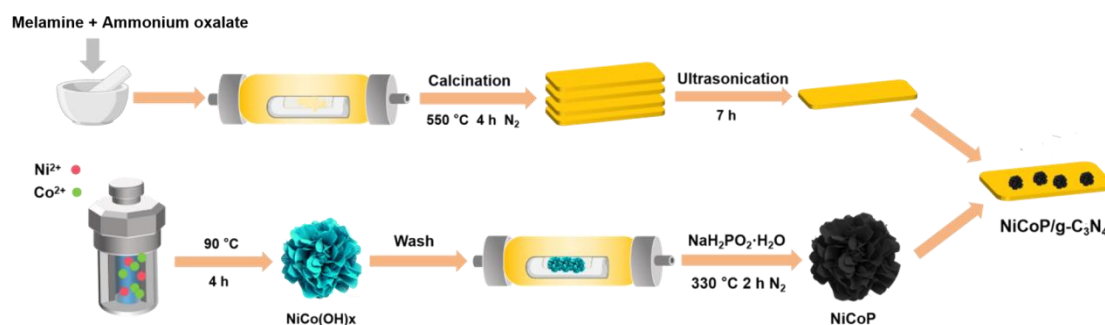

Figure S1 The synthesis route of NiCoP/g-C<sub>3</sub>N<sub>4</sub> Nanocomposites.

\* Corresponding author: (E-mail: hongmei256@163.com (H. Wang); laricswang@ecust.edu.cn (X. Wang))

† These authors contributed equally to this work.

## 1.2 Characterization of NiCoP/g-C<sub>3</sub>N<sub>4</sub> nanocomposites

The crystal structure of the samples was analyzed using X-ray powder diffraction (XRD, Shimadzu XRD-7000). The surface elemental composition and chemical states were investigated by X-ray photoelectron spectroscopy (XPS, Thermo Fisher Scientific Nexsa G2). The surface morphology of the samples was observed using a scanning electron microscope (SEM, Hitachi S-4800), while the microstructure and detailed morphology were further examined by high-resolution transmission electron microscopy (HRTEM, Thermo Scientific Talos F200X). The optical absorption properties of the NiCoP/CNN nanocomposites were evaluated using UV–visible diffuse reflectance spectroscopy (UV–vis DRS, Cary 5000). The separation efficiency of photogenerated charge carriers was characterized by photoluminescence spectroscopy (PL, F-4700) and time-resolved photoluminescence spectroscopy (TRPL, Edinburgh FLS98).

## 1.3 Photoelectrochemical performance measurement of NiCoP/g-C<sub>3</sub>N<sub>4</sub> Nanocomposites

The photoelectrochemical (PEC) performance of the samples was evaluated using a CHI-660E electrochemical workstation (Shanghai Chenhua) in a standard three-electrode configuration. A platinum wire was used as the counter electrode, an Ag/AgCl electrode as the reference electrode, and fluorine-doped tin oxide (FTO) glass coated with the photocatalyst served as the working electrode. The electrolyte consisted of 0.1 M Na<sub>2</sub>SO<sub>4</sub> aqueous solution. A 300 W xenon (Xe) lamp equipped with a UV cut-off filter ( $\lambda > 400$  nm) was used as the light source. To prepare the working electrode, 5.00 mg of the sample was ultrasonically dispersed in a mixed solution containing 800  $\mu$ L isopropanol, 200  $\mu$ L deionized water, and 40  $\mu$ L Nafion solution to form a homogeneous suspension. The resulting suspension was then uniformly drop-cast onto the surface of FTO glass (effective area  $\sim 2$  cm<sup>2</sup>) and dried at room temperature prior to PEC measurements.

## 1.4 Calculation of apparent quantum efficiency (AQE) of hydrogen evolution

The apparent quantum efficiency (AQE) of H<sub>2</sub> evolution was investigated under different monochromatic lights ( $\lambda = 420, 450$  and  $550$  nm). It was calculated by the following equation.

$$\text{AQE} = \frac{2 \times \text{Number of evolved H}_2 \text{ molecules}}{\text{Number of incident photons}} \times 100\%$$

## 2. Results and Discussion

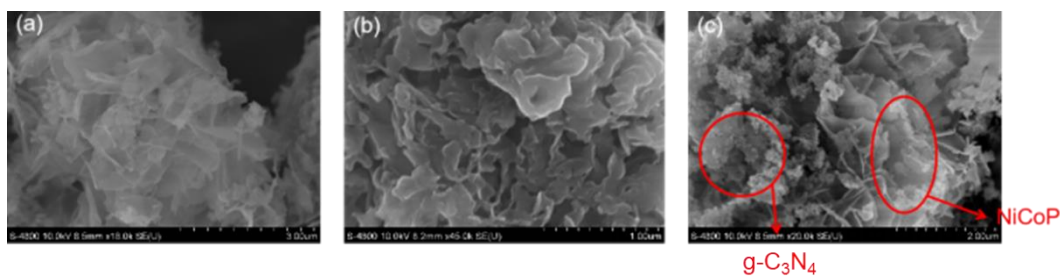

**Figure S2** SEM images: (a) NiCoP; (b) g-C<sub>3</sub>N<sub>4</sub>; (c) NiCoP/g-C<sub>3</sub>N<sub>4</sub>.

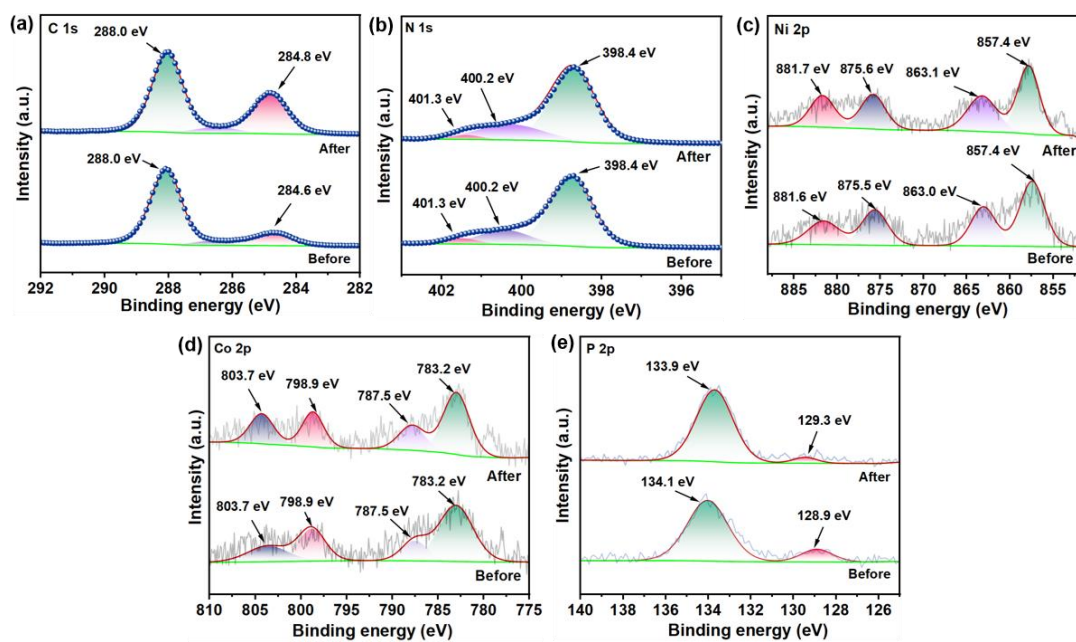

**Figure S3** XPS high resolution spectra of fresh and used 20% NiCoP/g-C<sub>3</sub>N<sub>4</sub> heterojunction:

(a) C 1s; (b) N 1s; (c) Ni 2p; (d) Co 2p; (e) P 2p.

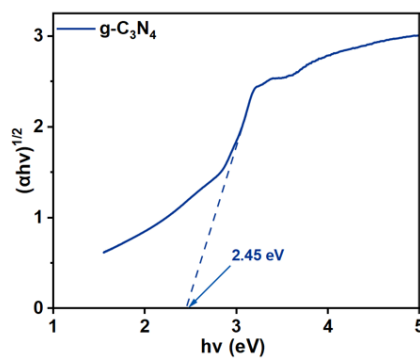

**Figure S4** The band gap of g-C<sub>3</sub>N<sub>4</sub>.

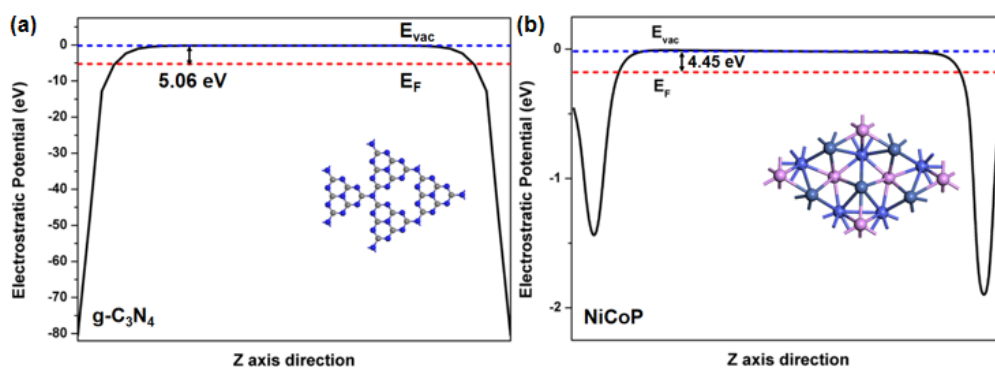

**Figure S5** The work function of (a) g-C<sub>3</sub>N<sub>4</sub> and (b) NiCoP.

**Table S1** Comparison of the H<sub>2</sub> revolution rates with other photocatalysts.

| Photocatalysts                                                            | Light source                    | Sacrificial reagent                                 | Seawater source | H <sub>2</sub> evolution rate (μmol·g <sup>-1</sup> ·h <sup>-1</sup> ) | Refs.    |
|---------------------------------------------------------------------------|---------------------------------|-----------------------------------------------------|-----------------|------------------------------------------------------------------------|----------|
| NiCoP/g-C <sub>3</sub> N <sub>4</sub>                                     | 300 W Xe lamp (λ ≥ 400 nm)      | 10 vol.% TEOA                                       | NSW             | 1290.0                                                                 | Our work |
| NiCoP/g-C <sub>3</sub> N <sub>4</sub>                                     | 300 W Xe lamp (λ ≥ 400 nm)      | 10 vol.% TEOA                                       | 3 wt% NaCl      | 1827.4                                                                 | Our work |
| ZCS/CNN                                                                   | 300 W Xe lamp (λ ≥ 400 nm)      | 10 vol.% TEOA                                       | ASW             | 726.5                                                                  | [1]      |
| CCTO/CNT                                                                  | 420 W Xe lamp                   | 4 vol.% TEOA                                        | Seawater        | 580                                                                    | [2]      |
| H-CoS/CdS                                                                 | λ ≥ 420 nm                      | Na <sub>2</sub> S + Na <sub>2</sub> SO <sub>3</sub> | ASW             | 143.1                                                                  | [3]      |
| Fe <sub>2</sub> O <sub>3</sub> /C-TiO <sub>2</sub>                        | 300 W Xe lamp (λ ≥ 420 nm)      | --                                                  | NSW             | 170.8                                                                  | [4]      |
| Z-scheme Na <sub>2</sub> Ti <sub>3</sub> O <sub>7</sub> /Ag/CdS           | 300 W Xe lamp (λ ≥ 420 nm)      | Na <sub>2</sub> S + Na <sub>2</sub> SO <sub>3</sub> | ASW             | 1793                                                                   | [5]      |
| CNv-mCN-Br                                                                | 300 W Xe lamp (λ ≥ 420 nm)      | TEOA + 1 wt% Pt                                     | ASW             | 34.4                                                                   | [6]      |
| In <sub>2</sub> S <sub>3</sub> /In <sub>2</sub> O <sub>3</sub> nanosheets | 5 W Blue-LED light (λ = 420 nm) | 0.1 M L-ascorbic                                    | ASW             | 618                                                                    | [7]      |
| Pt/o-g-C <sub>3</sub> N <sub>4</sub>                                      | Simulated solar light           | Glucose                                             | NSW             | 847                                                                    | [8]      |
| Brookite TiO <sub>2</sub>                                                 | Full solar spectrum             | --                                                  | ASW             | 1476                                                                   | [9]      |

Note: ASW referred to simulated seawater and NSW referred to nature seawater.

**Table S2** The fitting results of the EIS spectra of pure g-C<sub>3</sub>N<sub>4</sub>, pure NiCoP, 20%NiCoP/g-C<sub>3</sub>N<sub>4</sub> and 25%NiCoP/g-C<sub>3</sub>N<sub>4</sub> nanocomposites.

| Samples                                   | Rs ( $\Omega \cdot \text{cm}^2$ ) | CPE-T ( $\Omega^{-1} \cdot \text{cm}^{-2} \cdot \text{s}^{-n}$ ) | CPE-P   | R1 ( $\Omega \cdot \text{cm}^2$ ) |
|-------------------------------------------|-----------------------------------|------------------------------------------------------------------|---------|-----------------------------------|
| g-C <sub>3</sub> N <sub>4</sub>           | 26.80                             | $4.5362 \times 10^{-5}$                                          | 0.83473 | 12228                             |
| NiCoP                                     | 28.36                             | $12.1990 \times 10^{-5}$                                         | 0.81937 | 13321                             |
| 20% NiCoP/g-C <sub>3</sub> N <sub>4</sub> | 26.62                             | $3.8797 \times 10^{-5}$                                          | 0.83977 | 9128                              |
| 25% NiCoP/g-C <sub>3</sub> N <sub>4</sub> | 27.59                             | $9.1754 \times 10^{-5}$                                          | 0.85165 | 11553                             |

## References

- [1] Q. Xiao, Y. Fan and L. Zhou, *et al.*, Construction of bimetallic sulfide/carbon nitride nanocomposites for photocatalytic hydrogen evolution from simulated or natural seawater, *J. Photoch. Photobio. A*, 2026, **472**, 116810.
- [2] N. Chanda, B. Jaksani and S. Saha, *et al.*, CaCu<sub>3</sub>Ti<sub>4</sub>O<sub>12</sub>/CNT nanocomposite for enhanced photocatalytic seawater splitting to hydrogen generation, *Int. J. Hydrogen Energ.*, 2025, **140**, 36-44.
- [3] S. Liu, Y. Ma and D. Chi, *et al.*, Hollow heterostructure CoS/CdS photocatalysts with enhanced charge transfer for photocatalytic hydrogen production from seawater, *Int. J. Hydrogen Energ.*, 2022, **47**, 9220-9229.
- [4] Y. Yang, L. Liu and Q. Qi, *et al.*, A low-cost and stable Fe<sub>2</sub>O<sub>3</sub>/C-TiO<sub>2</sub> system design for highly efficient photocatalytic H<sub>2</sub> production from seawater, *Catal. Commun.*, 2020, **143**, 106047.
- [5] G. Xiong, S. Shen and S. Xiao, *et al.*, Well-defined Z-scheme Na<sub>2</sub>Ti<sub>3</sub>O<sub>7</sub>/Ag/CdS multidimensional heterojunctions with enhanced H<sub>2</sub> production from seawater under visible light, *Int. J. Hydrogen Energ.*, 2022, **47**, 30503-30516.
- [6] M. Guo, M. Chen and J. Xu, *et al.*, C, N-vacancies and Br dopant co-enhanced photocatalytic H<sub>2</sub> evolution of g-C<sub>3</sub>N<sub>4</sub> from water and simulated seawater splitting, *Chem. Eng. J.*, 2023, **461**, 142046.
- [7] Y. R. Lin, Y. C. Chang and F. H. Ko. One-pot microwave-assisted synthesis of In<sub>2</sub>S<sub>3</sub>/In<sub>2</sub>O<sub>3</sub> nanosheets as highly active visible light photocatalysts for seawater splitting, *Int. J. Hydrogen Energ.*, 2024, **52**, 953-963.
- [8] A. Speltini, A. Scalabrini and F. Maraschi, *et al.*, Improved photocatalytic H<sub>2</sub> production assisted by aqueous glucose biomass by oxidized g-C<sub>3</sub>N<sub>4</sub>, *Int. J. Hydrogen Energ.*, 2018, **43**,

14925-14933.

[9] J. Zhang, Y. Lei and S. Cao, *et al.*, Photocatalytic hydrogen production from seawater under full solar spectrum without sacrificial reagents using TiO<sub>2</sub> nanoparticles, *Nano Res.*, 2022, **15**, 2013- 2022.
